# Supplementary material for: Umbravirus-like RNA viruses are capable of independent systemic plant infection in the absence of encoded movement proteins
Source: PLoS Biol. 2024 Apr 25;22(4):e3002600. doi: 10.1371/journal.pbio.3002600 (PMC11081511; doi:10.1371/journal.pbio.3002600)
Supplement: S1 Data — (XLSX) [file pbio.3002600.s001.xlsx]

## Sheet: Table 1
Raw data for table 1
	Virus	Replication	# plants infiltrated	# plants with symptoms (wpi)					% plants with symptoms (wpi)
				2	3	4	6		2	3	4	6
	CY1	1	17	1	9	12	12		0.06	0.53	0.71	0.71
	CY2	1	17	9	15	15	15		0.53	0.88	0.88	0.88
	CY2T5	1	17	1	5	7	9		0.06	0.29	0.41	0.53
	CY2sgm1	1	17	0	5	8	9		0	0.29	0.47	0.53
	CY2sgm2	1	17	0	5	10	10		0	0.29	0.59	0.59
	CY1	2	17	0	8	10	10		0	0.47	0.59	0.59
	CY2	2	17	10	16	16	16		0.59	0.94	0.94	0.94
	CY2T5	2	15	2	7	10	10		0.13	0.47	0.67	0.67
	CY2sgm1	2	17	1	4	13	13		0.06	0.24	0.76	0.76
	CY2sgm2	2	14	2	7	12	12		0.14	0.5	0.86	0.86
	CY1	3	16	2	7	10	10		0.13	0.44	0.63	0.63
	CY2	3	14	9	11	11	11		0.64	0.79	0.79	0.79
	CY2T5	3	13	0	3	8	9		0	0.23	0.62	0.69
	CY2sgm1	3	11	0	4	6	7		0	0.36	0.55	0.64
	CY2sgm2	3	17	0	4	8	8		0	0.24	0.47	0.47

## Sheet: Table 2
Raw data for table 2
	Plant lines	replication	# of plants infiltrated	# plants with symptoms (wpi)				% plants with symptoms (wpi)
				2	3	4		2	3	4
	WT N.b.	1	5	0	1	1		0	0.2	0.2
	N.b.-ORF5CY2#1	1	6	0	3	3		0	0.5	0.5
	N.b.-ORF5CY2#2	1	6	0	3	3		0	0.5	0.5
	N.b.-ORF5OULV#1	1	6	1	5	5		0.17	0.83	0.83
	N.b.-ORF5OULV#2	1	6	2	5	5		0.33	0.83	0.83
	WT N.b.	2	8	0	5	7		0	0.63	0.88
	N.b.-ORF5CY2#1	2	8	3	7	8		0.38	0.88	1
	N.b.-ORF5CY2#2	2	7	2	7	7		0.29	1	1
	N.b.-ORF5OULV#1	2	9	7	9	9		0.78	1	1
	N.b.-ORF5OULV#2	2	8	7	8	8		0.88	1	1
	WT N.b.	3	9	0	1	5		0	0.11	0.56
	N.b.-ORF5CY2#1	3	9	2	4	7		0.22	0.44	0.78
	N.b.-ORF5CY2#2	3	7	4	6	7		0.57	0.86	1
	N.b.-ORF5OULV#1	3	9	1	5	7		0.11	0.56	0.78
	N.b.-ORF5OULV#2	3	7	1	5	6		0.14	0.71	0.86

## Sheet: Figure 8B
Relative quantification of PP2 transcripts
		Different infiltrations
		EV	PEMV2	WT	BD	PP2
		0.23	0.519586	1.5	1.24	0.69
		1.54	0.774282	0.69	1.68	0.91
		0.99	0.431507	0.83	0.96	0.5
		1.58	0.623349	0.56	1.65	1.71
		1.26	0.498824	1.27	2.57	0.71
		0.79	0.282078	4.3	1.03	0.34
		1.16	1.17649	0.8	1.19	1.1
		0.91	0.760054	2.79		0.58
		0.53		4.68
	Mean	0.998889	0.633272	1.93556	1.47429	0.8175
	Std deviation	0.445434	0.274173	1.59846	0.558476	0.430606
	SEM	0.148478	0.0969347	0.53282	0.211084	0.152242

## Sheet: Figure 8C
Relative quantification of CY1 transcripts
		Different infiltrations
		WT	BD	PP2
		1.75386	4.86876	0.000909789
		1.99504	2.91019	0.000442012
		2.29765	4.55899	0.0029858
		0.807778	4.36391	4.17277e-05
		0.300624	0.000296783	0.000149027
		0.747009	4.98066e-05	1.10117
		0.0589677	2.30809	0.847155
		0.0390743		3.77043e-05
	Mean	1	2.71576	0.244111
	Std deviation	0.897719	2.06971	0.455682
	SEM	0.317392	0.782276	0.161108
