# Supplementary material for: Umbravirus-like RNA viruses are capable of independent systemic plant infection in the absence of encoded movement proteins
Source: PLOS journal article supplement (doi:10.1371/journal.pbio.3002600), 2024-04-25
Supplement: S5 (10.1371/journal.pbio.3002600.s005) [file journal.pbio.3002600.s005]

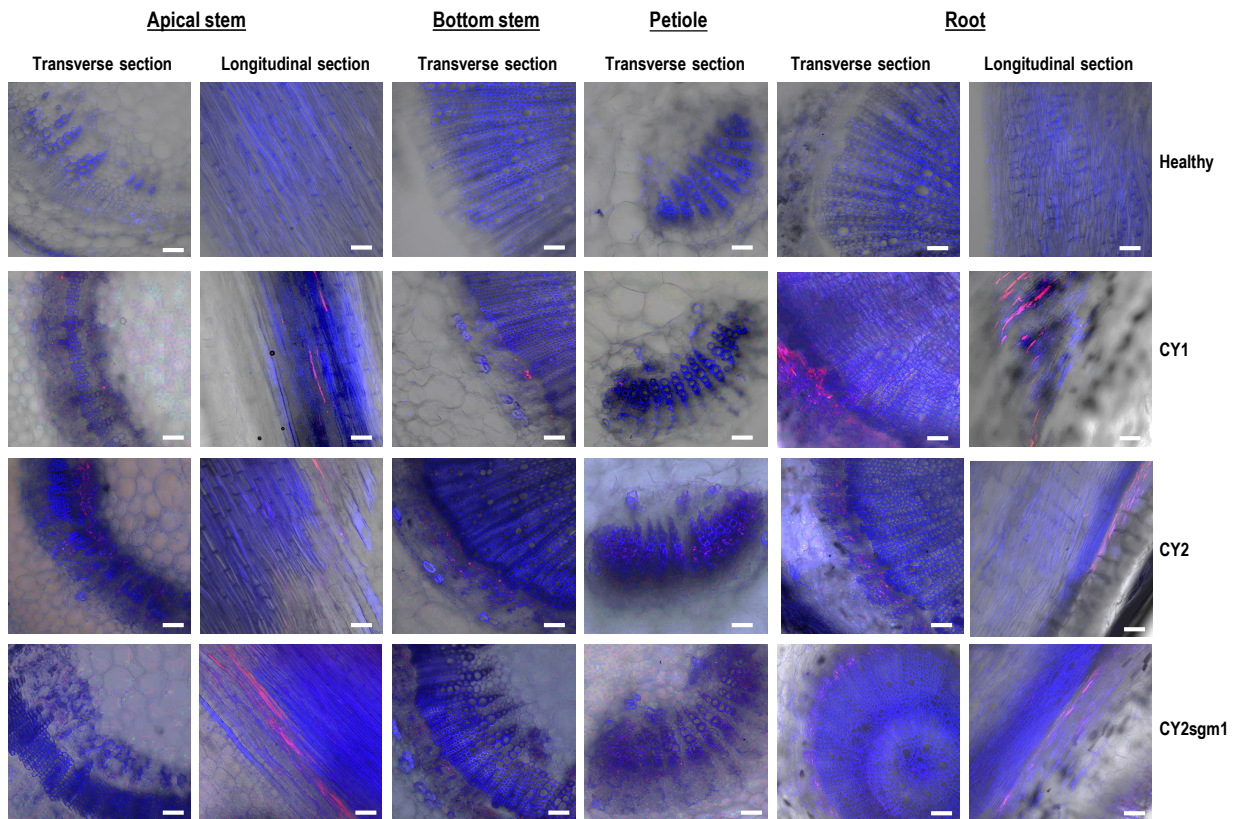

**S3 Fig. CY2 and CY2sgm1 accumulated in phloem tissues of stem, petiole, and roots.** FISH analysis of CY1, CY2 and CY2sgm1 at 60 dpi. Cy3-labeled oligonucleotide probe targeted CY1 and CY2 positions 1101-1131. DAPI-stained DNA and xylem tissue fluoresce blue. Bar = 50  $\mu$ m. No viral RNA signals were detected in non-phloem tissue.
