# Supplementary material for: Umbravirus-like RNA viruses are capable of independent systemic plant infection in the absence of encoded movement proteins
Source: PLOS journal article supplement (doi:10.1371/journal.pbio.3002600), 2024-04-25
Supplement: S6 (10.1371/journal.pbio.3002600.s006) [file journal.pbio.3002600.s006]

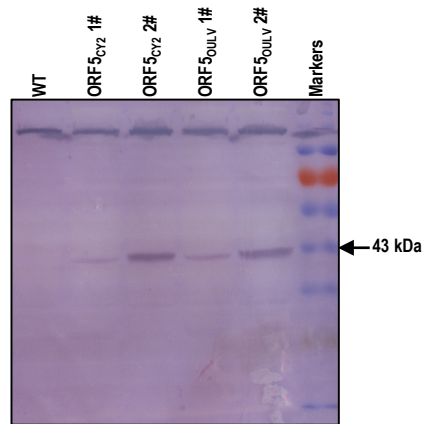

**S4 Fig. *N. benthamiana* transgenic plants expressing ORF5 proteins.** Western blot detection of ORF5<sub>CY2</sub> and ORF5<sub>OULV</sub>. CY2 is the closest related ORF5-expressing ULV to CY1 and OULV is the least related of the dicot-infecting ULVs. Total proteins were isolated from heterozygous T1 plants and subjected to 10% denaturing PAGE. Primary antibody was developed in rabbits against peptide SLVRETYIPSTTTGKE. ORF5 proteins are migrating as dimers under the conditions used.
