# Supplementary material for: Umbravirus-like RNA viruses are capable of independent systemic plant infection in the absence of encoded movement proteins
Source: PLOS journal article supplement (doi:10.1371/journal.pbio.3002600), 2024-04-25
Supplement: S10 (10.1371/journal.pbio.3002600.s010) [file journal.pbio.3002600.s010]

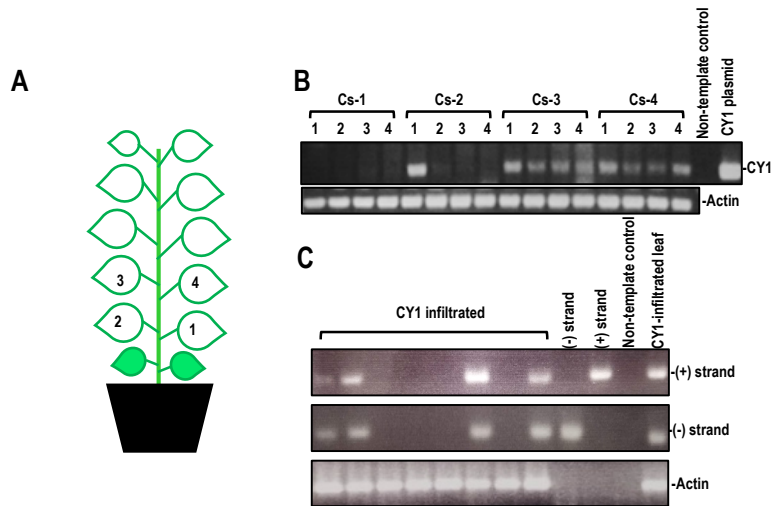

**S8 Fig. CY1 systemically infects cucumber.** **A.** Schematic representation of a cucumber plant (*Cucumis sativus* cv. Spacemaster) agroinfiltrated with CY1 on cotyledons (solid green). Systemic leaves (numbered 1 to 4) were used to test for the presence of CY1. **B.** Representative RT-PCR detection of CY1 in systemic leaves of 4 cucumber plants (Cs-1 to Cs-4) at 14 dpi. Negative control was the reaction in the absence of template and positive control was plasmid DNA containing full-length CY1. **C.** Strand-specific detection of (+)- and (-)-strand CY1 in systemic leaves of 8 cucumber plants infiltrated with CY1 at 21 dpi. (-)-strand and (+)-strand lanes used strand-specific primers and plasmid DNA containing full-length CY1.
